# Supplementary material for: Can clinical prediction models assess antibiotic need in childhood pneumonia? A validation study in paediatric emergency care
Source: PubMed Central journal article supplement (PMC6563975; doi:10.1371/journal.pone.0217570), 2019-06-13
Supplement: pone.0217570.s001.pdf [file pone.0217570.s001.pdf]

## Supplementary Material 1. Search strategy and in/exclusion criteria for systematic review

### Original search strategy, April 2016

| Database         | Number of articles | Number of articles after deleting duplicates |
|------------------|--------------------|----------------------------------------------|
| Embase.com       | 2676               | 2646                                         |
| Medline Ovid     | 1466               | 310                                          |
| Web of science   | 1462               | 610                                          |
| PubMed publisher | 52                 | 31                                           |
| Google scholar   | 223                | 158                                          |
| <b>Total</b>     | <b>5879</b>        | <b>3755</b>                                  |

#### Embase.com 2676

('pneumonia'/exp OR (pneumoni\* OR Bronchopneumoni\* OR Pleuropneumoni\*):ab,ti OR (('respiratory tract infection'/de OR 'lower respiratory tract infection'/de OR 'viral respiratory tract infection'/de OR (((respirator\* NEAR/6 infection\*) NOT (upper NOT lower))):ab,ti) AND ('antibiotic agent'/exp OR (antibiotic\*):ab,ti)) AND ('practice guideline'/exp OR 'decision making'/exp OR 'decision support system'/exp OR 'decision tree'/exp OR ((guideline\* OR ((decision OR prediction\*) NEAR/3 (making OR support\* OR tree\* OR model\* OR model\* OR algorithm\* OR triage\* OR protocol\* OR principle\* OR aid OR aids)):ab,ti OR ((guideline\* OR decision\* OR model OR tree OR prediction\* OR model\* OR algorithm\* OR triage\* OR protocol\* OR principle\*) NEAR/6 (develop\* OR propose\* OR new OR novel OR validat\* OR Evaluat\* OR implement\* OR modif\*)):ab,ti) AND (child/exp OR 'pediatrics'/de OR (preschool\* OR child\* OR schoolchild\* OR infan\* OR toddler\* OR pediatric\* OR paediatric\*):ab,ti) AND [english]/lim NOT ([Conference Abstract]/lim OR [Letter]/lim OR [Note]/lim OR [Editorial]/lim)

#### Medline Ovid 1466

(exp "pneumonia" / OR (pneumoni\* OR Bronchopneumoni\* OR Pleuropneumoni\*).ab,ti. OR ("Respiratory Tract Infections" / OR (((respirator\* ADJ6 infection\*) NOT (upper NOT lower)).ab,ti.) AND ("antibiotic agent" / OR (antibiotic\*).ab,ti.)) AND (exp "guideline" / OR exp "Decision Making" / OR "Decision Support Systems, Clinical" / OR "Decision Support Techniques" / OR "Decision Trees" / OR ((guideline\* OR ((decision OR prediction\*) ADJ3 (making OR support\* OR tree\* OR model\* OR model\* OR algorithm\* OR triage\* OR protocol\* OR principle\* OR aid OR aids)).ab,ti. OR ((guideline\* OR decision\* OR model OR tree OR prediction\* OR model\* OR algorithm\* OR triage\* OR protocol\* OR principle\*) ADJ6 (develop\* OR propose\* OR new OR novel OR validat\* OR Evaluat\* OR implement\* OR modif\*)).ab,ti.)) AND (exp child / OR infant / OR "pediatrics" / OR (preschool\* OR child\* OR schoolchild\* OR infan\* OR toddler\* OR pediatric\* OR paediatric\*).ab,ti.) AND english.la. NOT (letter OR news OR comment OR editorial OR congresses OR abstracts).pt.

#### Web of science 1462

TS=(((pneumoni\* OR Bronchopneumoni\* OR Pleuropneumoni\*) OR (((respirator\* NEAR/5 infection\*) NOT (upper NOT lower)))) AND ((antibiotic\*))) AND (((guideline\* OR ((decision OR prediction\*) NEAR/2 (making OR support\* OR tree\* OR model\* OR model\* OR algorithm\* OR triage\* OR protocol\* OR principle\* OR aid OR aids))) OR ((guideline\* OR decision\* OR model OR tree OR prediction\* OR model\* OR algorithm\* OR triage\* OR protocol\* OR principle\*) NEAR/5 (develop\* OR propose\* OR new OR novel OR validat\* OR Evaluat\* OR implement\* OR modif\*)))) AND ((preschool\* OR child\* OR schoolchild\* OR infan\* OR toddler\* OR pediatric\* OR paediatric\*)) ) AND LA=(english) AND DT=(article)

#### PubMed publisher 52

("pneumonia"[mh] OR (pneumoni\*[tiab] OR Bronchopneumoni\*[tiab] OR Pleuropneumoni\*[tiab]) OR ("Respiratory Tract Infections"[mh] OR (((respirator\*[tiab] AND infection\*[tiab]) NOT (upper[tiab] NOT lower[tiab])))) AND ("antibiotic agent"[mh] OR (antibiotic\*[tiab])))) AND ("guideline"[mh] OR "Decision Making"[mh] OR "Decision Support Systems, Clinical"[mh] OR "Decision Support Techniques"[mh] OR "Decision Trees"[mh] OR ((guideline\*[tiab] OR ((decision[tiab] OR prediction\*[tiab]) AND (making OR support\*[tiab] OR tree\*[tiab] OR model\*[tiab] OR model\*[tiab] OR algorithm\*[tiab] OR triage\*[tiab] OR protocol\*[tiab] OR principle\*[tiab] OR aid[tiab] OR aids[tiab]))) OR ((guideline\*[tiab] OR decision\*[tiab] OR model[tiab] OR tree[tiab] OR prediction\*[tiab] OR model\*[tiab] OR algorithm\*[tiab] OR triage\*[tiab] OR protocol\*[tiab] OR principle\*[tiab]) AND (develop\*[tiab] OR propose\*[tiab] OR new OR novel OR validat\*[tiab] OR Evaluat\*[tiab] OR implement\*[tiab] OR modif\*[tiab])))) AND (child[mh] OR infant[mh] OR "pediatrics"[mh] OR (preschool\*[tiab] OR child\*[tiab] OR schoolchild\*[tiab] OR infan\*[tiab] OR toddler\*[tiab] OR pediatric\*[tiab] OR paediatric\*[tiab])) AND english[la] NOT (letter[pt] OR news[pt] OR comment[pt] OR editorial[pt] OR congresses[pt] OR abstracts[pt]) AND publisher[sb]

#### Google scholar First 200

Pneumonia guideline | "decision | prediction making | support | tree | model | model | aid | aids" child | children | schoolchild | infants | pediatric | paediatric antibiotic | antibiotics | "anti biotic" allintitle:Pneumonia guideline | "decision | prediction making | support | tree | model | model | aid | aids" child | children | schoolchild | infants | pediatric | paediatric

## Update literature search, September 2017

| Database       | Number of articles | Number of articles after deleting duplicates |
|----------------|--------------------|----------------------------------------------|
| Embase.com     | 3092               | 3041                                         |
| Medline Ovid   | 1763               | 369                                          |
| Web of science | 1730               | 726                                          |
| Google scholar | 200                | 150                                          |
| <b>Total</b>   | <b>6785</b>        | <b>4286</b>                                  |

## In- and exclusion criteria for systematic review

| Characteristic      | Inclusion                                                                                | Exclusion                                                                 |
|---------------------|------------------------------------------------------------------------------------------|---------------------------------------------------------------------------|
| <b>Design</b>       | Studies assessing diagnostic accuracy or deriving or validating prediction models        | Reviews, conference abstracts, letters, notes, editorials, news, comments |
| <b>Participants</b> | Children aged 1 month to 5 years are substantial part (>50%) of the population.          | Out of age range, children with severe comorbidity                        |
| <b>Setting</b>      | Developed countries (based on the United Nations classification)<br>Emergency department | Developing countries<br>Primary care, in-hospital setting                 |
| <b>Intervention</b> | Multifactor clinical prediction rule including clinical features (and biomarkers).       | Rules without clinical features, or including tests not available at ED   |
| <b>Outcome</b>      | (bacterial) pneumonia<br>treatment advice for pneumonia                                  | Other diagnosis                                                           |
