# Supplementary material for: Can clinical prediction models assess antibiotic need in childhood pneumonia? A validation study in paediatric emergency care
Source: PubMed Central journal article supplement (PMC6563975; doi:10.1371/journal.pone.0217570), 2019-06-13

Supplementary Material 3 Figure. QUADAS-2 assessment

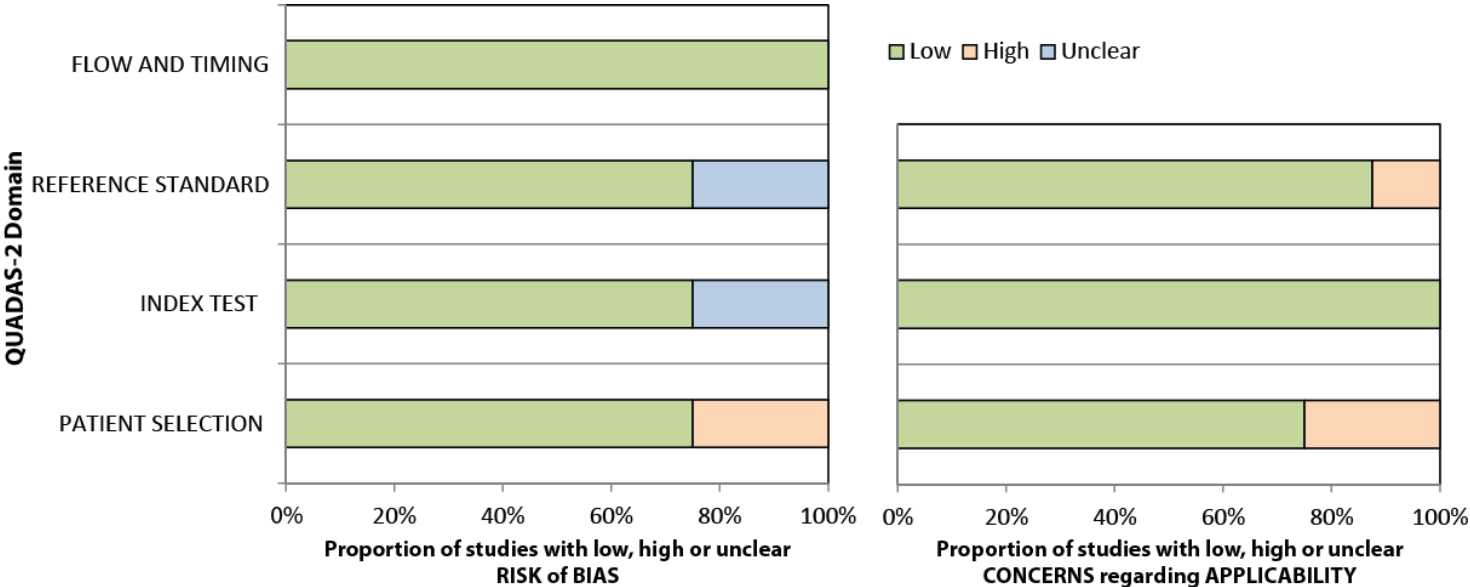

Supplement: pone.0217570.s004.pdf [file pone.0217570.s004.pdf]
