# Supplementary material for: Can clinical prediction models assess antibiotic need in childhood pneumonia? A validation study in paediatric emergency care
Source: PubMed Central journal article supplement (PMC6563975; doi:10.1371/journal.pone.0217570), 2019-06-13
Supplement: pone.0217570.s005.pdf [file pone.0217570.s005.pdf]

## Supplementary Material 4 Figure. Performance Model Lynch

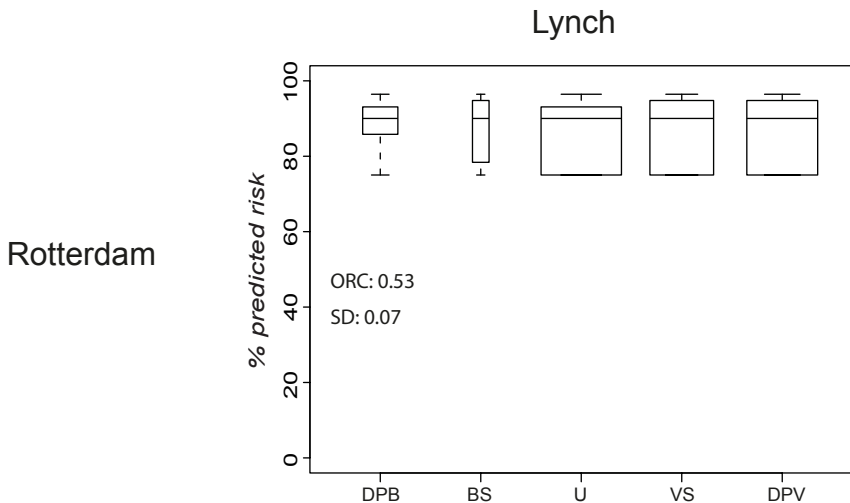

DPB = definite or probable bacterial, BS = bacterial syndrome, U = unknown, VS = viral syndrome, DPV = definite or probable viral; ORC = ordinal c-statistic; SD = standard deviation
