# Supplementary material for: Can clinical prediction models assess antibiotic need in childhood pneumonia? A validation study in paediatric emergency care
Source: PubMed Central journal article supplement (PMC6563975; doi:10.1371/journal.pone.0217570), 2019-06-13
Supplement: pone.0217570.s006.pdf [file pone.0217570.s006.pdf]

Supplementary Material 1 Table. Missings and proxies of predictor variables

| <i>Predictor variables</i>         | <b>Rotterdam, n=248</b> |                       | <b>Coventry, n=301</b> |                       |
|------------------------------------|-------------------------|-----------------------|------------------------|-----------------------|
|                                    | <i>Missing, n (%)</i>   | <i>Proxy</i>          | <i>Missing, n (%)</i>  | <i>Proxy</i>          |
| Age, months                        | none                    |                       | none                   |                       |
| Gender                             | none                    |                       | none                   |                       |
| Temperature (°C)                   | 12 (5)                  |                       | 4 (1.3)                |                       |
| Duration of fever (days)           | 189 (76)                |                       | 301 (100)              | Derivation population |
| Respiratory rate                   | 65 (26)                 |                       | 43 (14)                |                       |
| Heart rate                         | 41 (17)                 |                       | 7 (2)                  |                       |
| Oxygen saturation (%)              | 76 (30)                 |                       | 15 (5)                 |                       |
| Ill appearance                     | 99 (40)                 |                       | none                   | Toxic appearance      |
| Dyspnea                            | none                    |                       |                        |                       |
| Decreased breath sounds            | 112 (45)                |                       | 301 (100)              | NA                    |
| Crackles                           | 121 (49)                |                       | 301 (100)              | NA                    |
| Focal rales                        | 97 (39)                 |                       | 301 (100)              | NA                    |
| Retractions                        | 143 (57)                |                       | 301 (100)              | NA                    |
| Nasal flaring                      | 190 (77)                |                       | 301 (100)              | Dyspnea               |
| Prolonged capillary refill (>2sec) | 53 (21)                 |                       | 114 (38)               |                       |
| CRP, mg/L                          | 154 (62)                |                       | 192 (64)               |                       |
| Normal air entry                   |                         | Absence of dyspnea    |                        | Absence of dyspnea    |
| Resistin, ng/mL                    | 248 (100)               | Derivation population | 301 (100)              | Derivation population |
| PCT, ug/L                          | 248 (100)               | Derivation population | 301 (100)              | Derivation population |

NA = not assessed, no close proxy available
